# Supplementary material for: Small RNA F6 Provides Mycobacterium smegmatis Entry into Dormancy
Source: MDPI journal article supplement (doi:10.3390/ijms222111536), 2021-10-26
Supplement: s1 [file s1]

**Supplementary Table S2.****Oligonucleotides used in the study**

| Name                                                      | Sequence, 5'-3'                        |
|-----------------------------------------------------------|----------------------------------------|
| Oligonucleotides used for F6 deletion mutant construction |                                        |
| LHA_F6_R                                                  | TCTCTCGAATTCACGCCTCCGTTACACGTCCCGAAAA  |
| RHA_F6_F                                                  | TCTCTCGAATTCGGTTCGGGAGTGGCTTGATCCAAAGA |
| RHA_F6_R                                                  | CTCTCTGGATCCCGTGAGGCCGCCGACACCAT       |
| LHA-F6_F                                                  | TCTCTCAAGCTTGCCTTTCGCTCGCGGTACTACCT    |
| RHA_F6_seq_R                                              | ATCCCGGAGATGCAGGAGGCCA                 |
| RHA_F6_seq_F                                              | CCTGATCAGCGGCGCACACAGATCTT             |
| LHA_F6_seq_F                                              | GCATCGCCGCGGGTCGCTA                    |
| LHA_F6_seq_R                                              | GAACGCCTCGTGGATCTCGTAGAAGTCG           |
| F6-KO-check_for                                           | TCGCGGAGAAGAAGAAATCCA                  |
| F6-KO-check_rev                                           | TGGGGGCGTCACTACTCGT                    |
| Oligonucleotides used for Northern blotting               |                                        |
| NB_F6                                                     | GTCGGGTCGGGGGGTCAGACGGCAACACGGAGCTA    |
| NB-5S                                                     | GTGGTATCCAACGCAGAGT                    |
| Oligonucleotides used for quantitative RT-PCR             |                                        |
| Msm0149-for                                               | ACACCGAAACCGACACCCC                    |
| Msm0149-rev                                               | TTGGGGCGCAGACTTTCCC                    |
| Msm0150-for                                               | ATCTCTCTGCTGAACGCCTTGAC                |
| Msm0150-rev                                               | AACACGATGGCCGGAATGGA                   |
| Msm0157-rev                                               | TTGGTGGTGGCATTGGCAAGAG                 |
| Msm0157-for                                               | TTGCGCTACATCGGATTCCGG                  |
| Msm0162-for                                               | GCGCACTTCGGTTACCTGC                    |
| Msm0162-rev                                               | CGGCGTAGATCAGGCTGAACA                  |

|                                                     |                            |
|-----------------------------------------------------|----------------------------|
| msm4640-for1                                        | GTCAACTGGGACGCCATC         |
| msm4640-rev1                                        | ACGTGGACTGCTTGAAGTGC       |
| 16S-for                                             | ATGTCGGTTCCTTGTGGC         |
| 16S-rev                                             | CAAGGGTTGCGCTCGTTG         |
| Oligonucleotides used for constructions of plasmids |                            |
| UTR4640-for                                         | ACCTCTAGATAGTGATCGCGCGGTTG |
| UTR4640-rev                                         | CCAGGATCCTGCCGTACAAACGTTC  |
| UTR4640-mut-rev                                     | GACTTCCGACACGAGGACCG       |
| UTR4640_mut-for                                     | TGTGAAGGGCCACGATGATGATG    |
| F6-mut-rev                                          | TGTGGGTCAGACGGCAACACG      |
| F6-mut-for                                          | GACTCGACGGCAACACGGG        |
| 4640-for_BamH1                                      | GGATCCGTGAAGAGGGCCTTCG     |
| 4640-rev_EcoR1                                      | GAATTCCTAGCGACCGAAGGCG     |
| pAMYC-For                                           | AGCAAGAGATTACGCGCAGAC      |
| pAMYC-Rev                                           | GACAGTCATAAGTGCGGCGA       |
| pMV306-For                                          | TATGGAAAAACGCCAGCAACGC     |
| pMV306-Rev                                          | ATGCCTGGCAGTCGATCGTA       |

#### Plasmids used and generated in this study

| Plasmid          | Description                                                                                                               | Reference or source                                                   |
|------------------|---------------------------------------------------------------------------------------------------------------------------|-----------------------------------------------------------------------|
| p2NIL            | Cloning vector; Km <sup>r</sup>                                                                                           | [1]                                                                   |
| pGOAL19          | Plasmid carrying <i>hyg</i> , <i>lacZ</i> , and <i>sacB</i> genes in a PacI cassette; Amp <sup>r</sup> , Hyg <sup>r</sup> | [1]                                                                   |
| pF6_new_Knockout | Suicide vector to delete F6 in <i>M. smegmatis</i> ; Km <sup>r</sup> , Hyg <sup>r</sup>                                   | This study                                                            |
| pMV306hsp        | Integrative shuttle vector, Km <sup>r</sup>                                                                               | gift from Brian Robertson & Siouxsie Wiles (Addgene plasmid # 26155 ; |

|                                           |                                                                                                                                                                                                                                                                                                                                                                                                                                       |                                                                                                  |
|-------------------------------------------|---------------------------------------------------------------------------------------------------------------------------------------------------------------------------------------------------------------------------------------------------------------------------------------------------------------------------------------------------------------------------------------------------------------------------------------|--------------------------------------------------------------------------------------------------|
|                                           |                                                                                                                                                                                                                                                                                                                                                                                                                                       | <a href="http://n2t.net/addgene:26155">http://n2t.net/addgene:26155</a> ;<br>RRID:Addgene_26155) |
| pMV306_rrnB                               | <p>pMV306hsp derivative bearing <i>Msm rrnB</i> promoter (-79) and <i>rrnB</i> terminator, Km<sup>r</sup></p> <p>The fragment <i>Msm rrnB</i> promoter-<i>rrnB</i> terminator was taken from pMV261_<i>rrnB</i> [2] and cloned into pMV306hsp at the XbaI/SalI restriction sites</p>                                                                                                                                                  | This study                                                                                       |
| pMV306_F6                                 | <p>pMV306_rrnB derivative expressing F6 under <i>Msm rrnB</i> promoter, Km<sup>r</sup></p> <p>F6 gene was amplified from the <i>M. smegmatis</i> genomic DNA and cloned into pMV306_rrnB at the BamHI/HindIII restriction sites</p>                                                                                                                                                                                                   | This study                                                                                       |
| pMV306_MSMEG4640 <sup>5'utr</sup> GFP     | <p>pMV306_rrnB derivative expressing GFP fused with MSMEG4640 5'UTR under <i>Msm rrnB</i> promoter, Km<sup>r</sup></p> <p>GFP (a kind gift of Dr. Irina Boni, Shemyakin-Ovchinnikov Institute of Bioorganic Chemistry, Russia) was cloned into pMV306_rrnB at the BamHI/HindIII restriction sites. 5'UTR MSMEG-4640 was amplified with UTR-4640-for/UTR-4640-rev primers and cloned upstream GFP at XbaI/BamHI restriction sites.</p> | This study                                                                                       |
| pMV306_MSMEG4640 <sup>5'utr</sup> mut_GFP | <p>pMV306_rrnB derivative expressing GFP fused with mutant MSMEG4640 5'UTR, Km<sup>r</sup></p> <p>Mutations in 5'UTR4640 were introduced into pMV306_MSMEG4640<sup>5'utr</sup>GFP using a Q5 Site-Directed Mutagenesis Kit (NEB) and primers UTR4640-mut-for/UTR4640_mut-rev</p>                                                                                                                                                      | This study                                                                                       |

|             |                                                                                                                                                                                                                                                               |            |
|-------------|---------------------------------------------------------------------------------------------------------------------------------------------------------------------------------------------------------------------------------------------------------------|------------|
| pAMYC       | Replicative shuttle vector, Tet <sup>r</sup> , Cm <sup>r</sup><br>(pACYC184 derivative carrying <i>oriM</i> )                                                                                                                                                 | [3]        |
| pAMYC_rrnB  | pAMYC bearing <i>Msm rrnB</i> promoter and <i>rrnB</i> terminator, Tet <sup>r</sup> , Cm <sup>r</sup>                                                                                                                                                         | This study |
| pAMYC_F6    | pAMYC_rrnB derivative expressing F6 under <i>Msm rrnB</i> promoter, Tet <sup>r</sup> , Cm <sup>r</sup>                                                                                                                                                        | This study |
| pAMYC_F6mut | pAMYC_rrnB derivative expressing mutant F6 gene under <i>Msm rrnB</i> promoter, Tet <sup>r</sup> , Cm <sup>r</sup><br>Mutations in the F6 seed were introduced into pAMYC_F6 using a Q5 Site-Directed Mutagenesis Kit (NEB) and primers F6-mut-for/F6-mut-rev | This study |

***Mycobacterium smegmatis* strains generated in this study**

| Strain                                             | Description                                                                                                                                                                                                                  |
|----------------------------------------------------|------------------------------------------------------------------------------------------------------------------------------------------------------------------------------------------------------------------------------|
| ΔF6                                                | <i>M. smegmatis</i> mc <sup>2</sup> 155 lacking F6 gene                                                                                                                                                                      |
| ΔF6:pMV306                                         | <i>M. smegmatis</i> ΔF6 with integrated plasmid pMV306 rrnB (Km <sup>r</sup> )                                                                                                                                               |
| ΔF6:F6                                             | <i>M. smegmatis</i> ΔF6 with integrated plasmid pMV306 F6 (Km <sup>r</sup> )                                                                                                                                                 |
| Msm_GFP                                            | <i>M. smegmatis</i> bearing <i>Msm rrnB</i> '- ' <i>gfp</i> reporter in the chromosome (Km <sup>r</sup> )                                                                                                                    |
| Msm_MSMEG4640 <sub>5'utr</sub> ::GFP               | <i>M. smegmatis</i> bearing <i>Msm rrnB</i> '- ' <i>MSMEG4640</i> <sub>5'utr</sub> '- ' <i>gfp</i> reporter in the chromosome (Km <sup>r</sup> )                                                                             |
| Msm_MSMEG4640 <sub>5'utr</sub> mut::GFP            | <i>M. smegmatis</i> bearing <i>Msm rrnB</i> '- ' <i>MSMEG4640</i> <sub>5'utr</sub> mut'- ' <i>gfp</i> reporter                                                                                                               |
| MsmΔF6_MSMEG4640 <sub>5'utr</sub> ::GFP            | <i>M. smegmatis</i> ΔF6 bearing <i>Msm rrnB</i> '- ' <i>MSMEG4640</i> <sub>5'utr</sub> '- ' <i>gfp</i> reporter                                                                                                              |
| MsmΔF6__F6_MSMEG4640 <sub>5'utr</sub> ::GFP        | <i>M. smegmatis</i> ΔF6 bearing F6 gene in the replicative shuttle vector (Cm <sup>r</sup> ) and <i>Msm rrnB</i> '- ' <i>MSMEG4640</i> <sub>5'utr</sub> '- ' <i>gfp</i> reporter in the chromosome (Km <sup>r</sup> )        |
| MsmΔF6__F6mut_MSMEG4640 <sub>5'utr</sub> ::GFP     | <i>M. smegmatis</i> ΔF6 bearing mutant F6 gene in the replicative shuttle vector (Cm <sup>r</sup> ) and <i>Msm rrnB</i> '- ' <i>MSMEG4640</i> <sub>5'utr</sub> '- ' <i>gfp</i> reporter in the chromosome (Km <sup>r</sup> ) |
| MsmΔF6__F6mut_MSMEG_4640 <sub>5'utr</sub> mut::GFP | <i>M. smegmatis</i> ΔF6 bearing mutant F6 gene and <i>Msm rrnB</i> '- ' <i>MSMEG4640</i> <sub>5'utr</sub> mut'- ' <i>gfp</i> reporter (Km <sup>r</sup> )                                                                     |

Amp<sup>r</sup>, ampicillin resistant; Km<sup>r</sup>, kanamycin resistant, Tet<sup>r</sup>, tetracycline resistant; Cm<sup>r</sup>, chloramphenicol resistant

#### References:

1. Parish, T.; Stoker, N.G. Use of a flexible cassette method to generate a double unmarked *Mycobacterium tuberculosis* tlyA plcABC mutant by gene replacement. *Microbiology* **2000**, *146*, 1969-1975.
2. Ignatov, D.V.; Salina, E.G.; Fursov, M.V.; Skvortsov, T.A.; Azhikina, T.L.; Kaprelyants, A.S. Dormant non-culturable *Mycobacterium tuberculosis* retains stable low-abundant mRNA. *BMC genomics* **2015**, *16*, 1-13.
3. Aseev, L.V., Koledinskaya, L.S., Bychenko, O.S. and Boni, I.V., Regulation of Ribosomal Protein Synthesis in *Mycobacteria*: The Autogenous Control of rpsO. *International Journal of Molecular Sciences*, **2021**. 22(18), p.9679.
